# Supplementary material for: High Effectiveness of a Smoking Cessation Program During the COVID-19 Pandemic
Source: Preprints.org preprint supplement (doi:10.20944/preprints202303.0536.v1), 2023-03-31
Supplement: Supplementary file 1 [file supplementary]

SUPPLEMENTARY MATERIAL

Article title: High effectiveness of a smoking cessation program during the COVID-19 pandemic

Authors: Aleksandra Kruk, Celina Czerwińska, Justyna Dolna-Michno, Elżbieta Broniatowska, and Emanuel Kolanko

Questionnaire 1 Assessment of the smoking status at baseline in participants of the “Take a deep breath” program.

| **Question** | **Answer** |
| --- | --- |
| Q1. How soon after waking up do you smoke your first cigarette | Within the first 5 minutes  Within the first 6-30 minutes  Within the first 31-60 minutes |
| Q2. Do you find it difficult to refrain from smoking in places where it is not allowed? | Yes  No |
| Q3. How many cigarettes do you smoke on average per day? | 10 a day or less  11-20 a day  21-30 a day  31 a day or more |
| Q4. Can you refrain from smoking even when you are sick and stay in bed most of the day? | Yes  No |
| Q5. What type of tobacco products do you use most often? | Cigarettes  E-cigarettes  Tobacco heating system  Water pipe  Pipe  Cigar  Other  I do not know / I do not want to answer this question |
| Q6. How often do you smoke? | Once a day  Few times a day  Few times a week  Occasionally |

Questionnaire 2 Follow-up interview by phone after at least a minimum of 1-year participation in the program

| **Area of assessment** | | **Question** | **Answer** |
| --- | --- | --- | --- |
| Prevalence of tobacco smoking; key aspects of tobacco surveillance | Current smoking status | Q1. Are you a current smoker? Do you smoke every day, not every day, or not at all? | Every day  Not every day  Not at all  I do not know / I do not want to answer this question |
| Past smoking status for smokers who currently do not smoke every day | Q2a. In the past, did you smoke cigarettes every day? | Yes  No |
| Past smoking status | Q2b. In the past, did you smoke cigarettes every day or not every day? | Every day  Not every day  I do not know / I do not want to answer this question |
| Intensity of physical addiction to nicotine, differentiation between biological and behavioral addiction | | Q3. How many cigarettes do you smoke on average per day or per week? | 10 a day or less  11-20 a day  21-30 a day  31 a day or more  10 a week or less  11-20 a week  21-30 a week  31 a week or more  I do not know / I do not want to answer this question |
| Q4. How soon after waking up do you smoke your first cigarette? | Within the first 5 minutes  Within the first 6-30 minutes  Within the first 31-60 minutes |
| Q5. Do you find it difficult to refrain from smoking in places where it is not allowed? | Yes  No |
| Q6. Can you refrain from smoking even when you are sick and stay in bed most of the day? | Yes  No |
| Q7. What type of tobacco products do you use most often? | Cigarettes  E-cigarettes  Other  Tobacco heating system  Water pipe  Pipe  Cigar  I do not know / I do not want to answer this question |
| Effectiveness of smoking cessation program | | Q8. Since you joined the program, have you had any consultations in the tobacco treatment center? | Yes  No  I do not know / I do not want to answer this question |
| Q9. Since you joined the program, how many times have you tried to quit smoking? | *(provide the number of times)* |
| Q10. How long is it since you have quitted smoking? | *(provide the number of months)* |
| Q11. Have you used pharmacotherapy to help you quit smoking? | Yes  No  I do not know / I do not want to answer this question |
| Q12. What type of medicine or nicotine replacement therapy have you used? | *(provide the name of the product)* |
| Motivation for smoking cessation | | Q13. What made you quit smoking? | *(provide the reason)* |
